# Supplementary material for: Biocatalytic CO2 fixation initiates selective oxidative cracking of 1-naphthol under ambient conditions
Source: Royal Society of Chemistry journal article supplement (doi:10.1039/d2gc01226j), 2022-01-01
Supplement: d2gc01226j1.pdf [file d2gc01226j1.pdf]

## SUPPORTING INFORMATION

### Electronic Supporting Information

# Biocatalytic CO<sub>2</sub> fixation initiates selective oxidative cracking of 1-naphthol under ambient conditions

Pengju Ren,<sup>a,b,c</sup> Zijian Tan,<sup>b,c</sup> Yingying Zhou,<sup>b,c</sup> Hongzhi Tang,<sup>d</sup> Ping Xu,<sup>d</sup> Haifeng Liu,<sup>\*e</sup> and Leilei Zhu<sup>\*b,c</sup>

<sup>a</sup>University of Chinese Academy of Sciences, Beijing 100049, China; <sup>b</sup>Tianjin Institute of Industrial Biotechnology, Chinese Academy of Sciences, Tianjin 300308, China; <sup>c</sup>National Technology Innovation Center of Synthetic Biology, Tianjin 300308, China; <sup>d</sup>State Key Laboratory of Microbial Metabolism, Joint International Research Laboratory of Metabolic & Developmental Sciences, and School of Life Sciences & Biotechnology, Shanghai Jiao Tong University, Shanghai 200240, People's Republic of China; <sup>e</sup>Jiangsu Collaborative Innovation Centre of Chinese Medicinal Resources Industrialization, School of Pharmacy, Nanjing University of Chinese Medicine, Nanjing 210023, P. R. China.

#### Corresponding Author:

haifeng.liu@njucm.edu.cn;  
zhu\_ll@tib.cas.cn.

## Table of Contents

### 1. Experimental Procedures

- 1.1 Materials and methods
- 1.2 Construction of expression vectors
- 1.3 HPLC, NMR and ESI-MS analysis
- 1.4 Shake-flask expression and purification of 1-hydroxy-2-naphthoate dioxygenase and nonoxidative (de)carboxylases
- 1.5 Dioxygenase-catalyzed cracking of 1-hydroxy-2-naphthoic acid
- 1.6 Kinetic characterization of three nonoxidative (de)carboxylases
- 1.7 Nonoxidative (de)carboxylase-catalyzed carboxylation of 1-naphthol
- 1.8 Conversion of 1-naphthol to 2'-carboxybenzylzyl-pyruvic acid by coupling nonoxidative (de)carboxylase with dioxygenase
- 1.9 Effects of bicarbonate concentration on the conversion of 1-naphthol to 2'-carboxybenzylzyl-pyruvic acid
- 1.10 Atmospheric CO<sub>2</sub> fixation initiated one-pot cascade conversion of 1-naphthol to 2'-carboxybenzylzyl-pyruvic acid
- 1.11 Enzymatic synthesis, purification and characterization of 2'-carboxybenzylzyl-pyruvic acid
- 1.12 Activity measurement of 2,3-DHBD<sub>Ao</sub> and 1-HNDO<sub>Mv</sub> at different pH values

### 2. Results and Discussion (Supporting)

- Supplementary Figure S1
- Supplementary Figure S2
- Supplementary Figure S3
- Supplementary Figure S4
- Supplementary Figure S5
- Supplementary Figure S6
- Supplementary Figure S7
- Supplementary Figure S8
- Supplementary Figure S9
- Supplementary Figure S10
- Supplementary Figure S11
- Supplementary Figure S12
- Supplementary Table S1
- Supplementary Table S2
- Supplementary Scheme S1

3.

References

# SUPPORTING INFORMATION

## 1. Experimental Procedures

### 1.1 Materials and methods

All analytical grade or higher quality chemicals and reagents were purchased from Macklin (Shanghai, China). HPLC solvents were purchased from JOHN LONG (Beijing, China). NADH was purchased from Solarbio (Tianjin, China). Ni Sepharose 6 Fast Flow resin was purchased from GE Healthcare (Boston, USA).

### 1.2 Construction of expression vector

The genes encoding the enzymes used in this study were synthesized and subsequently cloned into plasmid pRSFDuet1 by Genewiz (Beijing, China), including 2,3-dihydroxybenzoic acid decarboxylase from *Aspergillus oryzae* (2,3-DHBD\_Ao)<sup>1,2</sup>, 2,6-dihydroxybenzoic acid decarboxylase from *Rhizobium* sp. (2,6-DHBD\_Rs)<sup>3,4</sup>, salicylic acid decarboxylase from *Trichosporon moniliforme* (SAD\_Tm)<sup>5</sup>, 1-hydroxy-2-naphthoate dioxygenase from *Mycobacterium vanbaalenii* PYR-1 (1-HNDO\_Mv)<sup>6</sup>. His-tag was appended in the C-terminal of the target gene for purification. *E. coli* BL21 Gold (DE3) was the host for the enzyme expression.

### 1.3 HPLC, NMR and ESI-MS analysis

HPLC analysis was performed to determine the amounts of 1-hydroxy-2-naphthoic acid (1-H2NA) and 2'-carboxybenzylzyl-pyruvic acid. The reaction samples (1 mL) were diluted by 1 mL acetonitrile and vigorous mixing. The supernatant from centrifugation (12,000 g, 10 min) was collected for HPLC analysis. HPLC (Thermo Dionex UltiMate 3000 equipped with DAD detector) analysis was carried out on an Ultimate XB-C18 column (4.6×250 mm, 5 μm, Welch Materials Inc., Shanghai, China) and eluted with an acetonitrile-sodium acetate (5 mM) gradient. The acetonitrile gradient was as follows: (1) analysis of 1-H2NA: 0 to 7 min, 5% (vol/vol), 0.6 mL/min (flow rate); 7 to 15 min, 5 to 80%, 0.8 mL/min; 15 to 22 min, 80%, 0.8 mL/min; 22 to 27 min, 80 to 5%, 0.6 mL/min; 27 to 30 min, 5%, 0.6 mL/min. (2) Analysis of 2'-carboxybenzylzyl-pyruvic acid: 0 to 7 min, 5%, 0.6 mL/min; 7 to 12 min, 5 to 45%, 0.8 mL/min; 12 to 24 min, 45 to 50%, 0.8 mL/min; 24 to 30 min, 50 to 5%, 0.6 mL/min. The absorbance of the eluent was monitored at 250 and 300 nm. <sup>1</sup>H-NMR, <sup>13</sup>C-NMR and <sup>1</sup>H-<sup>13</sup>C Heteronuclear multiple bond coherence (HMBC) 2D-NMR spectra were recorded on a Bruker AVANCEIII spectrometer with a 5 mm BBO probe at 300 K. Mass spectra (ESI-MS) of 2'-carboxybenzylzyl-pyruvic acid was recorded on an Agilent 6230 TOF LC/MS.

### 1.4 Shake-flask expression and purification of 1-hydroxy-2-naphthoate dioxygenase and nonoxidative (de)carboxylases

Single clone was inoculated in LB liquid medium supplemented with Kanamycin (50 μg/mL) at 37°C. When optical density at 600 nm (OD<sub>600</sub>) reached 0.7, gene expressions were induced by Isopropyl-β-D-thiogalactopyranoside (IPTG, 50 μM) at 20°C for 24 h. Subsequently, *E. coli* cells were harvested by centrifugation (4°C, 4,000 rpm, 15 min), suspended in lysis buffer (50mM NaH<sub>2</sub>PO<sub>4</sub>, 300 mM NaCl, and 10mM imidazole, pH8.0) and disrupted through high-pressure homogenization. The cell lysates were centrifugated (4°C, 12,000 rpm, 30 min) and then the supernatants (crude enzymes) were purified by Ni Sepharose 6 Fast Flow (GE Healthcare) containing column. Purified proteins in elution buffer were subsequently washed and concentrated by Amicon Ultra-4 10 kDa Centrifugal Filter Device (Merck Millipore, Schwalbach, Germany). The homogeneity of purified enzymes was detected by 12% sodium dodecyl sulfate polyacrylamide gel electrophoresis (SDS-PAGE). The concentration of proteins was determined by BCA Protein Assay Kit (Sangon Biotech, Shanghai, China) with BSA as the standard.

### 1.5 Dioxygenase-catalyzed cracking of 1-hydroxy-2-naphthoic acid

For 1-HNDO\_Mv-catalyzed cleavage of the substituted benzene ring in 1-hydroxy-2-naphthoic acid (1-H2NA), the 1 mL reaction mixture in 15 mL tube contained 1-H2NA (1-15 mM), N, N-dimethylformamide (DMF, 5%, v/v), K<sub>2</sub>HPO<sub>4</sub>-KH<sub>2</sub>PO<sub>4</sub> buffer (pH 7.0, 100 mM) and purified 1-HNDO\_Mv (0.5 mg/mL). The reaction mixture was incubated (220 rpm) at 30 °C. After 30 min incubation, the reaction was terminated by acetonitrile (MeCN, 1 mL) and vigorous mixing. The supernatant from centrifugation (12,000g, 10 min) was collected for HPLC analysis.

### 1.6 Kinetic characterization of three nonoxidative (de)carboxylases

For kinetic characterization, the final concentration of 2,3-DHBD\_Ao, 2,6-DHBD\_Rs and SAD\_Tm was 1.41 μM, 35.31 μM and 5.41 μM, respectively. Carboxylases were exposed to different concentration of 1-naphthol (1.6, 3.2, 6.4, 12, 18 and 20 mM) and fixed concentration of KHCO<sub>3</sub> (200mM). The fluorescent properties of 1-H2NA, exciting and emission wavelength corresponding to 350 nm and 420 nm respectively, was used to determine the initial reaction rate of carboxylation. The initial-velocity data obtained was fitted to the equation  $V = V_{max}[S]/([S]+K_m)$ .  $V$  is the initial velocity,  $V_{max}$  is the maximum velocity,  $[S]$  is the substrate concentration, and  $K_m$  is the Michaelis constant.

### 1.7 Nonoxidative (de)carboxylase-catalyzed carboxylation of 1-naphthol

For enzymatic carboxylation of 1-naphthol, the 1 mL reaction mixture in 15 mL tube contained 1-naphthol (15 mM), KHCO<sub>3</sub> (200 mM), DMF (4% v/v), K<sub>2</sub>HPO<sub>4</sub>-KH<sub>2</sub>PO<sub>4</sub> buffer (pH7.0, 100 mM) and purified nonoxidative (de)carboxylases (2,3-DHBD\_Ao, 2,6-DHBD\_Rs, SAD\_Tm, 0.75 mg/mL). The reaction mixture was incubated (220 rpm) at 30°C. After 12 h incubation, the reaction was terminated by MeCN (1 mL) and vigorous mixing. The supernatant from centrifugation (12,000g, 10 min) was collected for HPLC analysis.

### 1.8 Conversion of 1-naphthol to 2'-carboxybenzylzyl-pyruvic acid by coupling nonoxidative (de)carboxylase with dioxygenase

## SUPPORTING INFORMATION

Three nonoxidative (de)carboxylases (2,3-DHBD\_Ao, 2,6-DHBD\_Rs and SAD\_Tm) were investigated to be coupled with 1-hydroxy-2-naphthoate dioxygenase (1-HNDO\_Mv) for the conversion of 1-naphthol to 2'-carboxybenzylzyl-pyruvic acid. The 1 mL reaction mixture in 15 mL tube contained 1-naphthol (15 mM), KHCO<sub>3</sub> (200 mM), DMF (4% v/v), K<sub>2</sub>HPO<sub>4</sub>-KH<sub>2</sub>PO<sub>4</sub> buffer (pH7.0, 100 mM), purified carboxylases (0.75 mg/mL) and 1-HNDO\_Mv (0.5 mg/mL). The reaction mixture was incubated (220 rpm) at 30°C. After 12 h incubation, the reaction was terminated by MeCN (1 mL) and vigorous mixing. The supernatant from centrifugation (12,000g, 10 min) was collected for HPLC analysis.

### 1.9 Effects of bicarbonate concentration on the conversion of 1-naphthol to 2'-carboxybenzylzyl-pyruvic acid

To determine the effect of the bicarbonate concentration on conversion rate, the cascade reaction to convert 1-naphthol to 2'-carboxybenzylzyl-pyruvic acid was conducted using various concentrations of bicarbonate. For this, the 1 mL reaction mixture in 15 mL tube contained 1-naphthol (15 mM), DMF (4% v/v), purified 2,3-DHBD\_Ao (0.75 mg/mL), purified 1-HNDO\_Mv (0.5/mL mg), K<sub>2</sub>HPO<sub>4</sub>-KH<sub>2</sub>PO<sub>4</sub> buffer (pH7.0, 100 mM), 45-150 mM KHCO<sub>3</sub>, 30-100 mM NaH<sub>2</sub>PO<sub>4</sub> (150 mM HCO<sub>3</sub><sup>-</sup> and 100 mM H<sub>2</sub>PO<sub>4</sub><sup>-</sup>, 150 mM HCO<sub>3</sub><sup>-</sup> and 60 mM H<sub>2</sub>PO<sub>4</sub><sup>-</sup>, 150 mM HCO<sub>3</sub><sup>-</sup> and 30 mM H<sub>2</sub>PO<sub>4</sub><sup>-</sup>, 90 mM HCO<sub>3</sub><sup>-</sup> and 100 mM H<sub>2</sub>PO<sub>4</sub><sup>-</sup>, 90 mM HCO<sub>3</sub><sup>-</sup> and 60 mM H<sub>2</sub>PO<sub>4</sub><sup>-</sup>, 90 mM HCO<sub>3</sub><sup>-</sup> and 30 mM H<sub>2</sub>PO<sub>4</sub><sup>-</sup>, 45 mM HCO<sub>3</sub><sup>-</sup> and 30 mM H<sub>2</sub>PO<sub>4</sub><sup>-</sup>, 45 mM HCO<sub>3</sub><sup>-</sup> and 60 mM H<sub>2</sub>PO<sub>4</sub><sup>-</sup>, 45 mM HCO<sub>3</sub><sup>-</sup> and 100 mM H<sub>2</sub>PO<sub>4</sub><sup>-</sup>). The reaction mixture was incubated in a sealed tube (220 rpm) at 30°C. After 12 h incubation, the reaction was terminated by MeCN (1 mL) and vigorous mixing. The supernatant from centrifugation (12,000 g, 10 min) was collected for HPLC analysis.

### 1.10 Atmospheric CO<sub>2</sub> fixation initiated one-pot cascade conversion of 1-naphthol to 2'-carboxybenzylzyl-pyruvic acid

For one-pot enzymatic conversion of 1-naphthol to 2'-carboxybenzylzyl-pyruvic acid, a 20 mL-reaction in 50 mL tube was conducted with 1-naphthol (15 mM), DMF (4% v/v), K<sub>2</sub>HPO<sub>4</sub>-KH<sub>2</sub>PO<sub>4</sub> buffer (pH 7.5, 100 mM), purified 2,3-DHBD\_Ao (0.75 mg/mL) and 1-HNDO\_Mv (0.5 mg/mL). Atmospheric CO<sub>2</sub> was slowly bubbled into the reaction mixture incubated at 30°C. After 12 h incubation, the reaction terminated by MeCN (20 mL) with vigorous mixing. The supernatant from centrifugation (12,000 g, 10 min) was collected for HPLC analysis.

### 1.11 Enzymatic synthesis, purification and characterization of 2'-carboxybenzylzyl-pyruvic acid

The 100 mL reaction mixture in 250 mL flask contained 1-naphthol (15 mM), KHCO<sub>3</sub> (100 mM), DMF (4% v/v), K<sub>2</sub>HPO<sub>4</sub>-KH<sub>2</sub>PO<sub>4</sub> buffer (pH7.0, 100 mM), purified 2,3-DHBD\_Ao (0.75 mg/mL) and 1-HNDO\_Mv (0.5 mg/mL). The reaction mixture was incubated (220 rpm) at 30°C until full conversion of 1-naphthol was confirmed by thin-layer chromatography (TLC, silica gel 60 F254 plates, visualized by UV light irradiation, 254 nm). After 20 min incubation at 80°C to inactivate enzymes, the supernatant in reaction mixture was collected from centrifugation (12,000 g, 10 min), lyophilized and dissolved in the minimal volume of methanol. The target product, 2'-carboxybenzylzyl-pyruvate in methanol solution was precipitated by adding excess ethyl acetate. The precipitated 2'-carboxybenzylzyl-pyruvate was collected by centrifugation, washed by ethyl acetate and then dried at room temperature for the following characterization by ESI-MS (Fig. S1), <sup>1</sup>H-NMR (Fig. S2-3), <sup>13</sup>C-NMR (Fig. S4-5) and <sup>1</sup>H-<sup>13</sup>C HMBC 2D-NMR (Fig. S6).

### 1.12 Activity measurement of 2,3-DHBD\_Ao and 1-HNDO\_Mv at different pH values

To investigate the catalytic activity of 2,3-DHBD\_Ao, 0.5 mg/ml 2,3-DHBD\_Ao was mixed with reaction buffer (100 mM KPi buffer, pH 6.5, 7.0 and 7.5) containing 10 mM 1-naphthol 100 mM of KHCO<sub>3</sub>. The target product 1-H2NA was quantified (Ex=350 nm, Em= 420 nm) to evaluate the activity of 2,3-DHBD\_Ao.

To investigate the catalytic activity of 1-HNDO\_Mv, 0.1 mg/ml 1-HNDO was mixed with reaction buffer (100 mM KPi buffer, pH 6.5, 7.0 and 7.5) containing 0.2 mM 1-H2NA. Along with cleavage of 1-H2NA, the fluorescence reduction of 1-H2NA was measured (Ex=350 nm, Em= 420 nm) to evaluate the activity of 1-HNDO\_Mv.

## 2. Results and Discussion (Supporting)

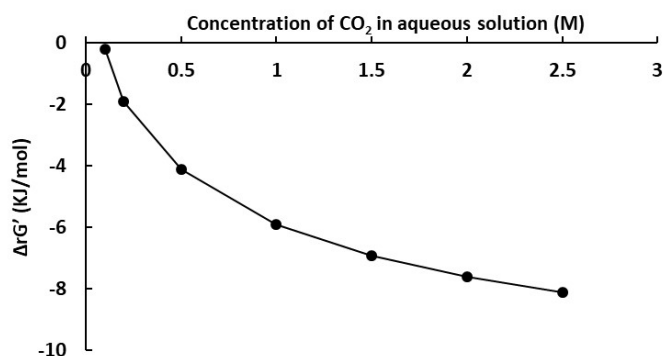

**Fig. S1** Calculated  $\Delta_rG'$  values with different concentration of CO<sub>2</sub> in aqueous solution with eQuilibrator (10 mM 1-naphthol, 0.1~2.5 M CO<sub>2</sub> (aq), 40  $\mu$ M 1-hydroxy-2-naphthoate, pH=7.5, pMg=3, ionic strength=0.25 M)

# SUPPORTING INFORMATION

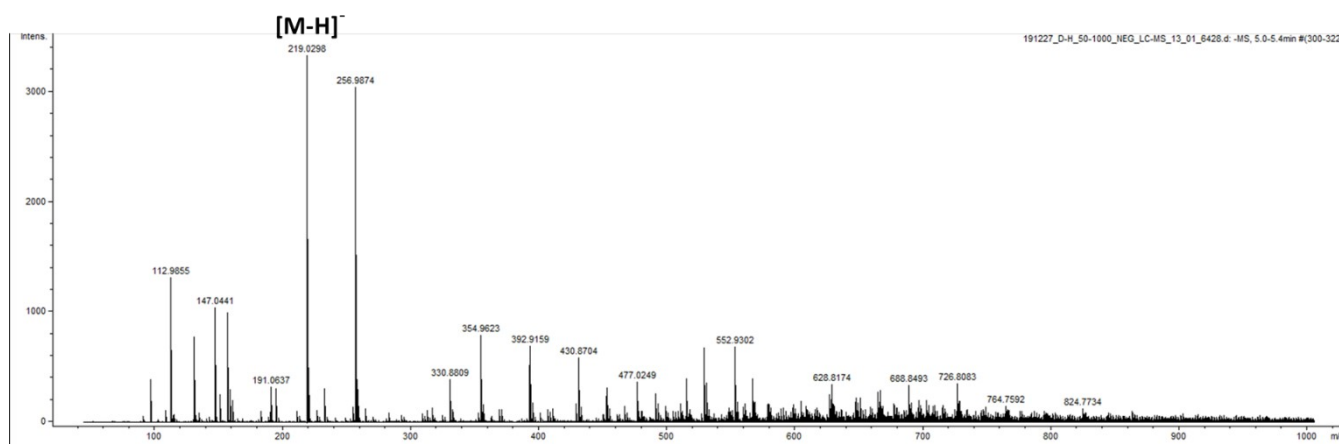

**Fig. S2** The ESI-MS spectrum of 2'-carboxybenzylzyl-pyruvic acid ( $[M-H]^- = 219$ ).

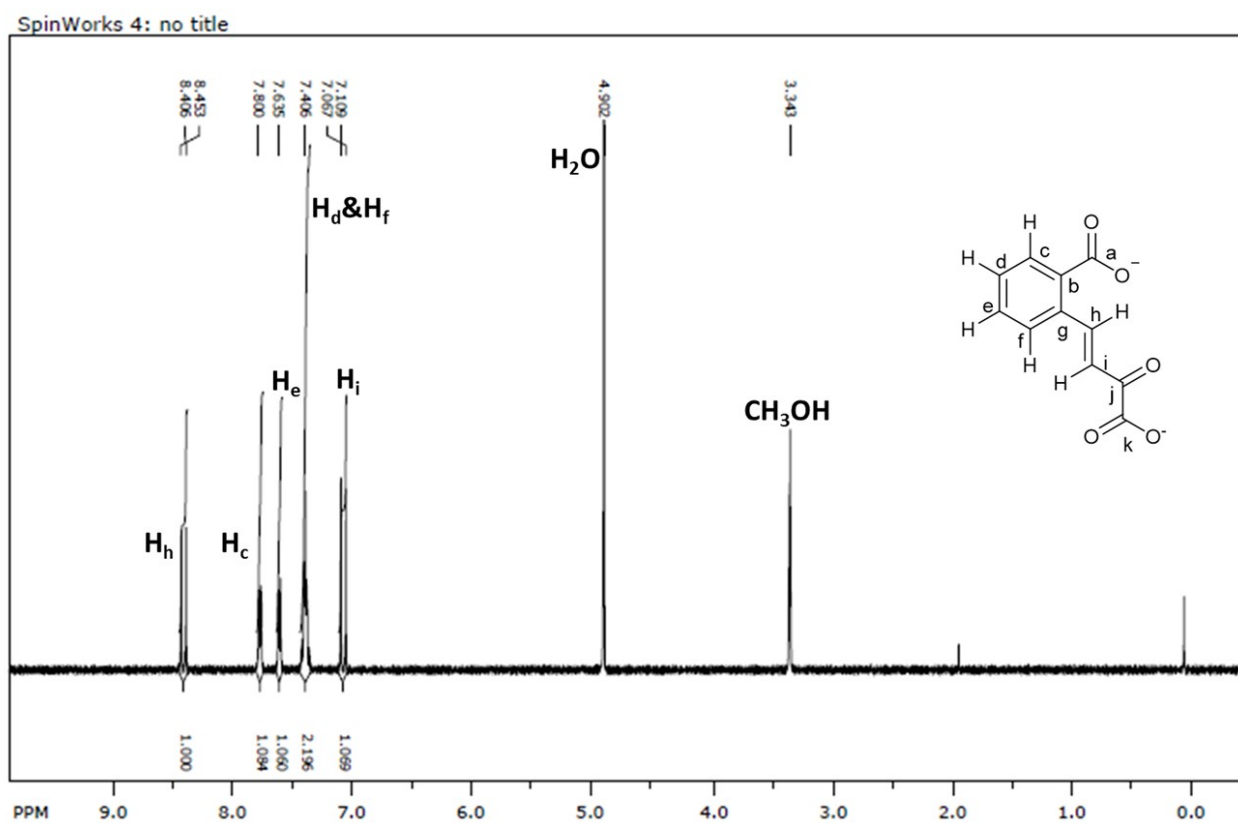

**Figure S3** <sup>1</sup>H-NMR of 2'-carboxybenzylzyl-pyruvate (400 MHz, CD<sub>3</sub>OD).

# SUPPORTING INFORMATION

SpinWorks 4: no title

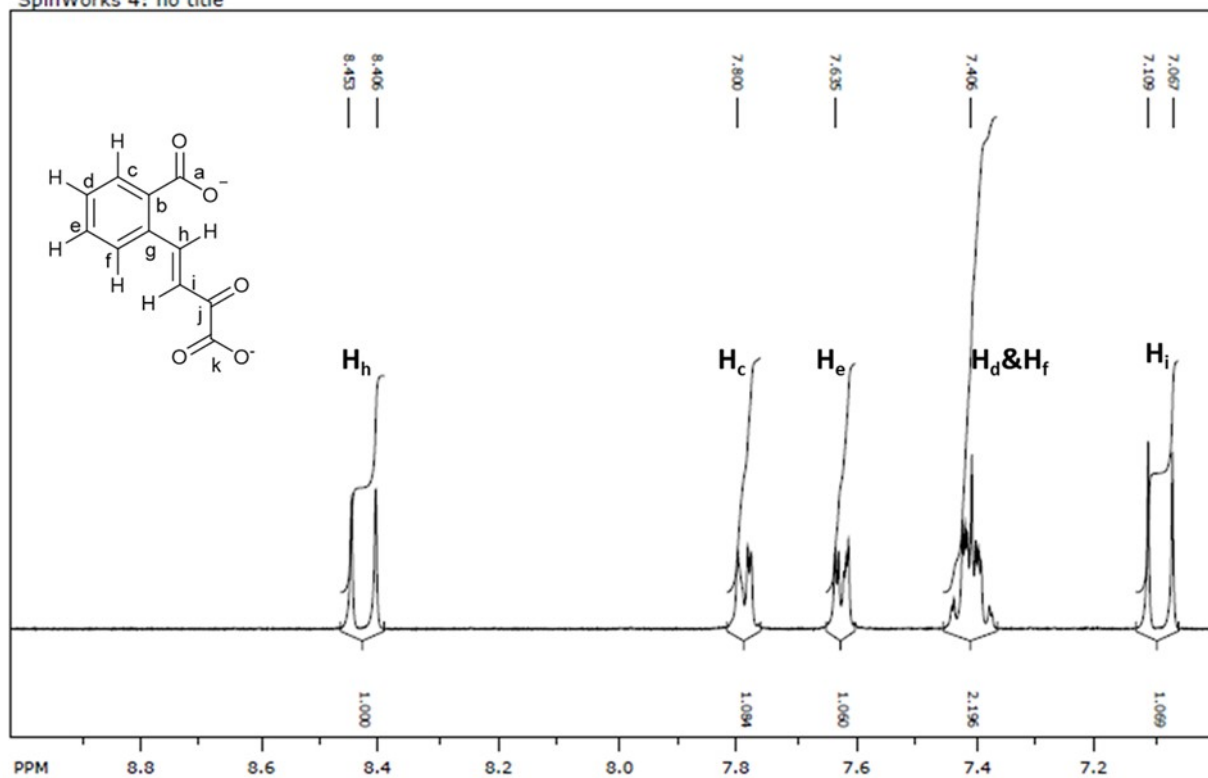

Fig. S4 <sup>1</sup>H-NMR of 2'-carboxybenzylzyl-pyruvate (zoom 7.0–9.0 ppm).

SpinWorks 4: no title

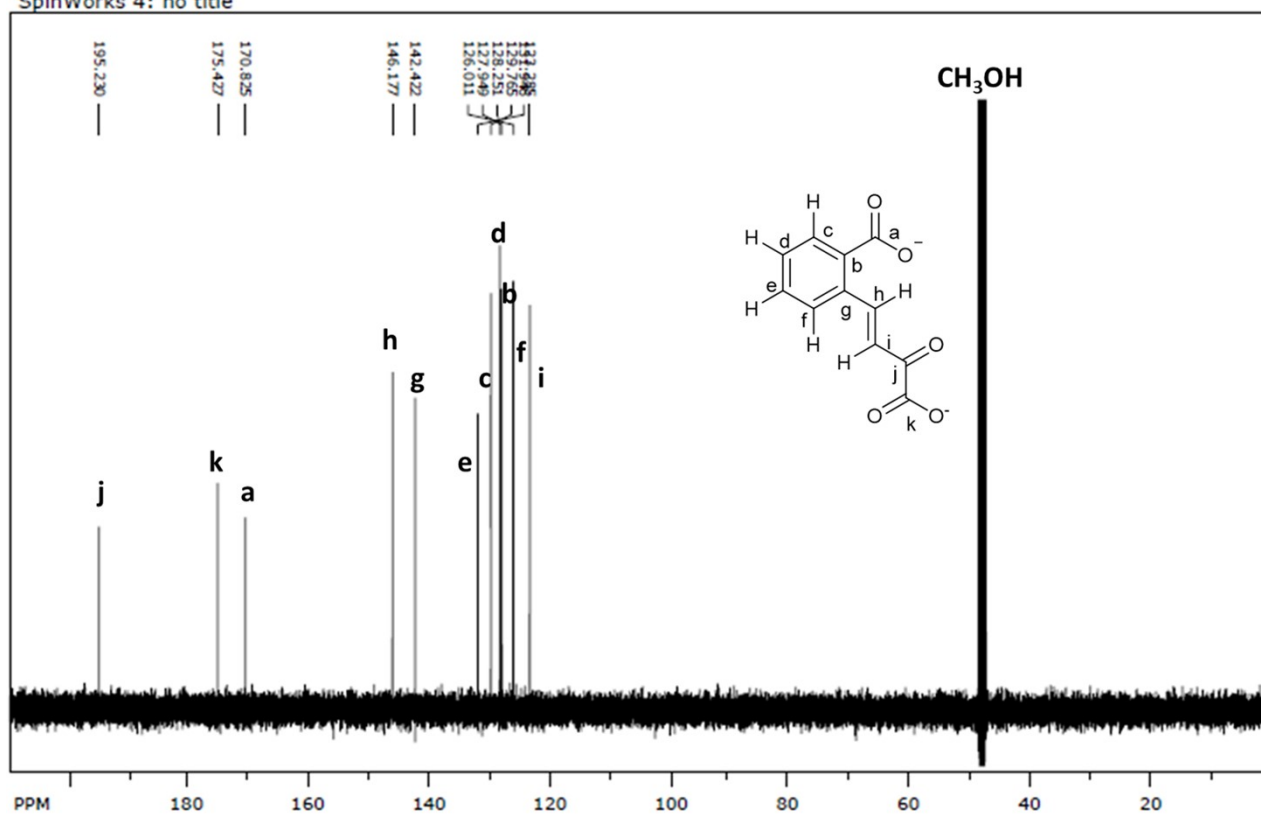

Fig. S5 <sup>13</sup>C-NMR of 2'-carboxybenzylzyl-pyruvate (100 MHz, CD<sub>3</sub>OD).

# SUPPORTING INFORMATION

SpinWorks 4: no title

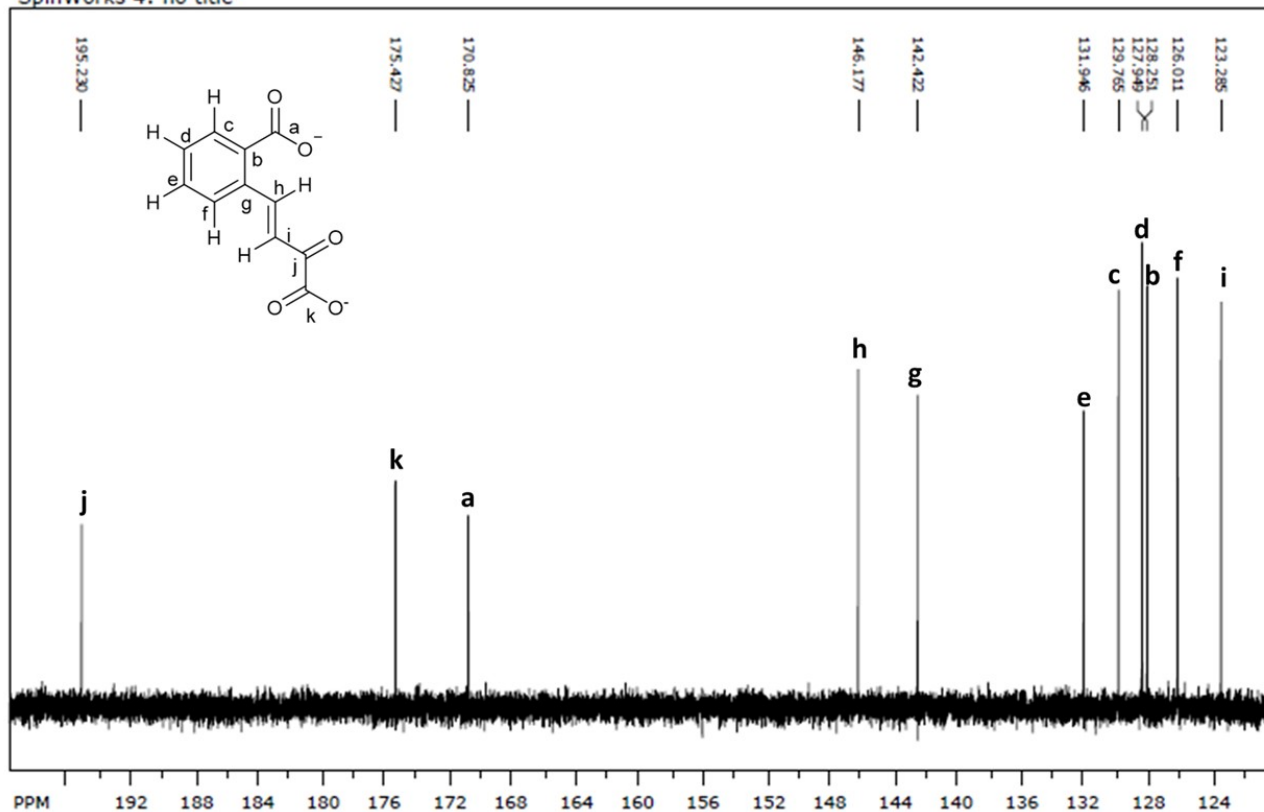

Fig. S6  $^{13}\text{C}$ -NMR of 2'-carboxybenzylzyl-pyruvate (zoom 120–200 ppm).

SpinWorks 4: no title

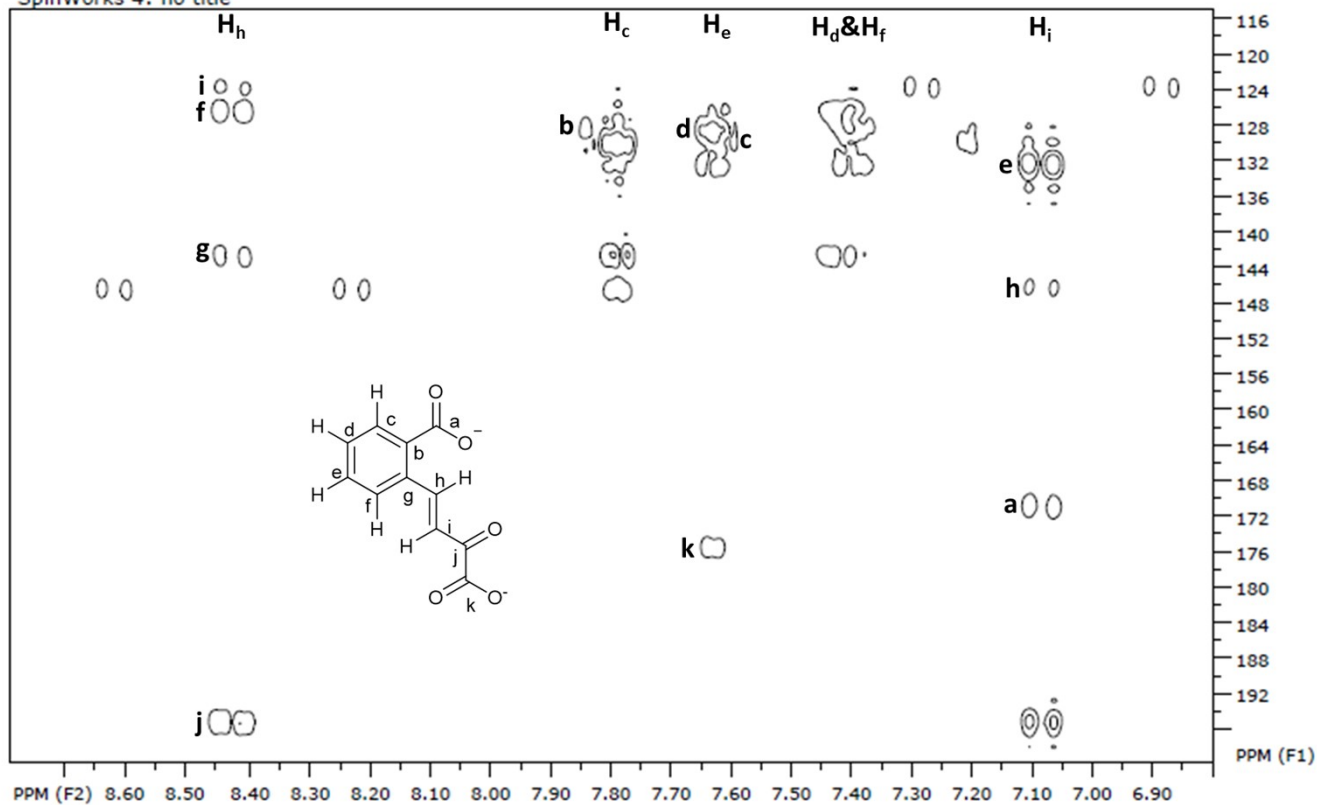

Fig. S7  $^1\text{H}$ - $^{13}\text{C}$  HMBC of 2'-carboxybenzylzyl-pyruvate (400 MHz,  $\text{CD}_3\text{OD}$ ).

## SUPPORTING INFORMATION

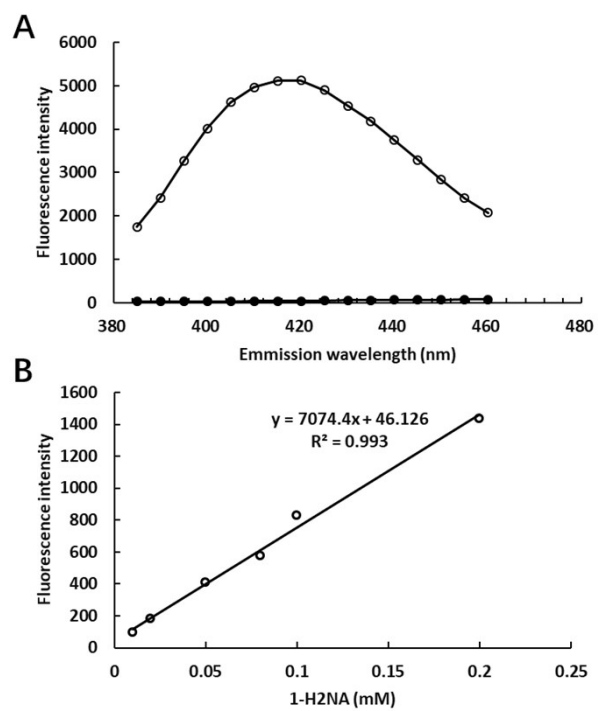

**Fig. S8** A. The fluorescence spectrum of 1-naphthol (●) and 1-H2NA (○). B. Standard curve of 1-H2NA.  $E_x=350$  nm and  $E_m=420$  nm.

## SUPPORTING INFORMATION

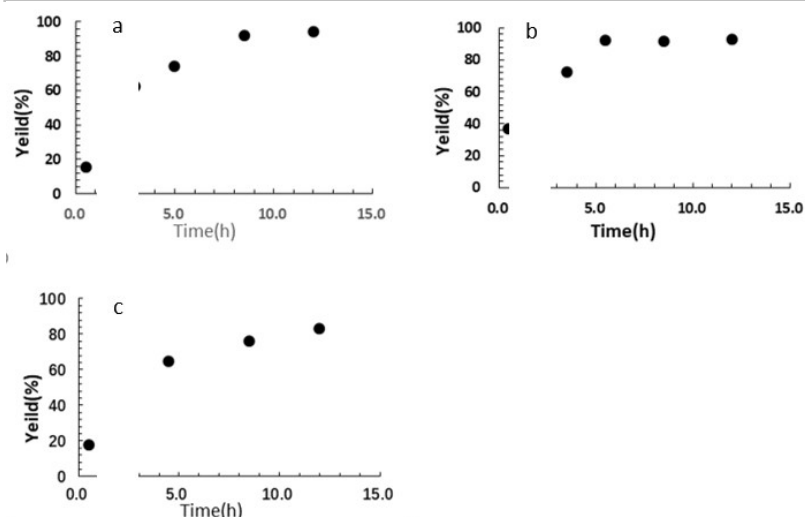

**Fig. S9** Time course for the conversion of 1-naphthol to 2'-carboxybenzylzyl-pyruvic acid performed with different concentration of KHCO<sub>3</sub> and NaH<sub>2</sub>PO<sub>4</sub> at 30°C for 12 h. (a): 90 mM HCO<sub>3</sub><sup>-</sup> and 30 mM H<sub>2</sub>PO<sub>4</sub><sup>-</sup>, (b): 150 mM HCO<sub>3</sub><sup>-</sup> and 30 mM H<sub>2</sub>PO<sub>4</sub><sup>-</sup>, (c): 45 mM HCO<sub>3</sub><sup>-</sup> and 30 mM H<sub>2</sub>PO<sub>4</sub><sup>-</sup>.

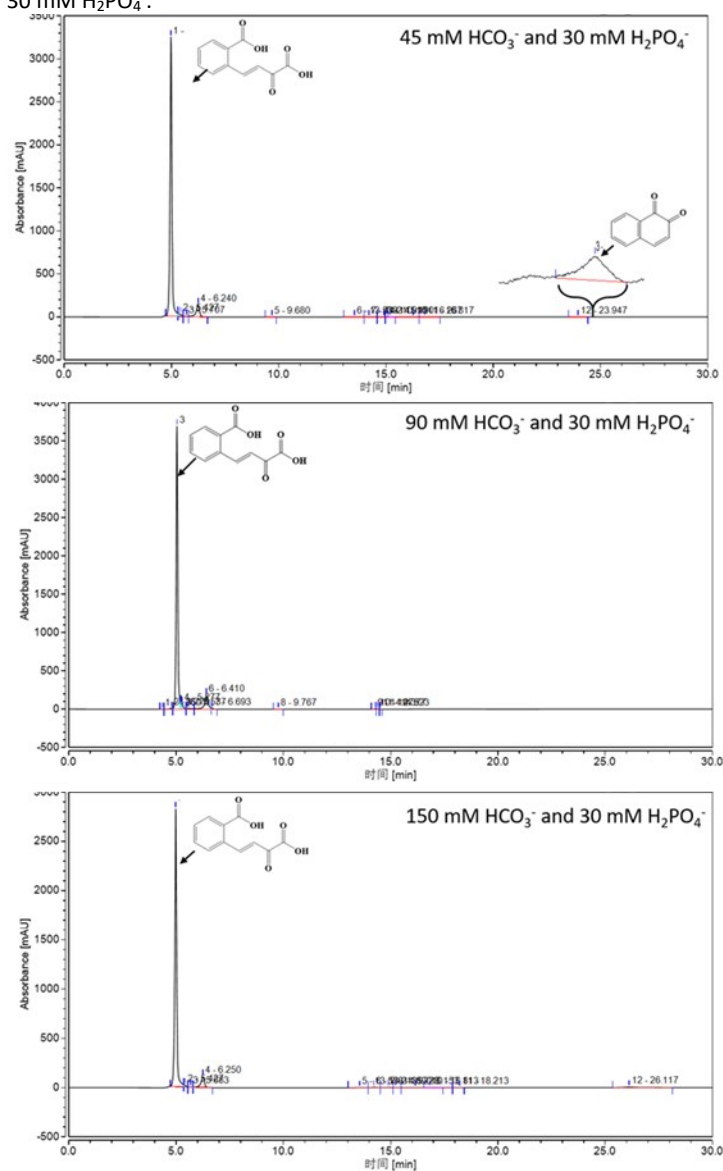

**Fig. S10** HPLC analysis of the products of the coupled carboxylation-oxygenation reactions. Conversion of 1-naphthol to 2'-carboxybenzylzyl-pyruvic acid was performed with different concentration of KHCO<sub>3</sub> and NaH<sub>2</sub>PO<sub>4</sub> at 30°C for 12 h.



# SUPPORTING INFORMATION

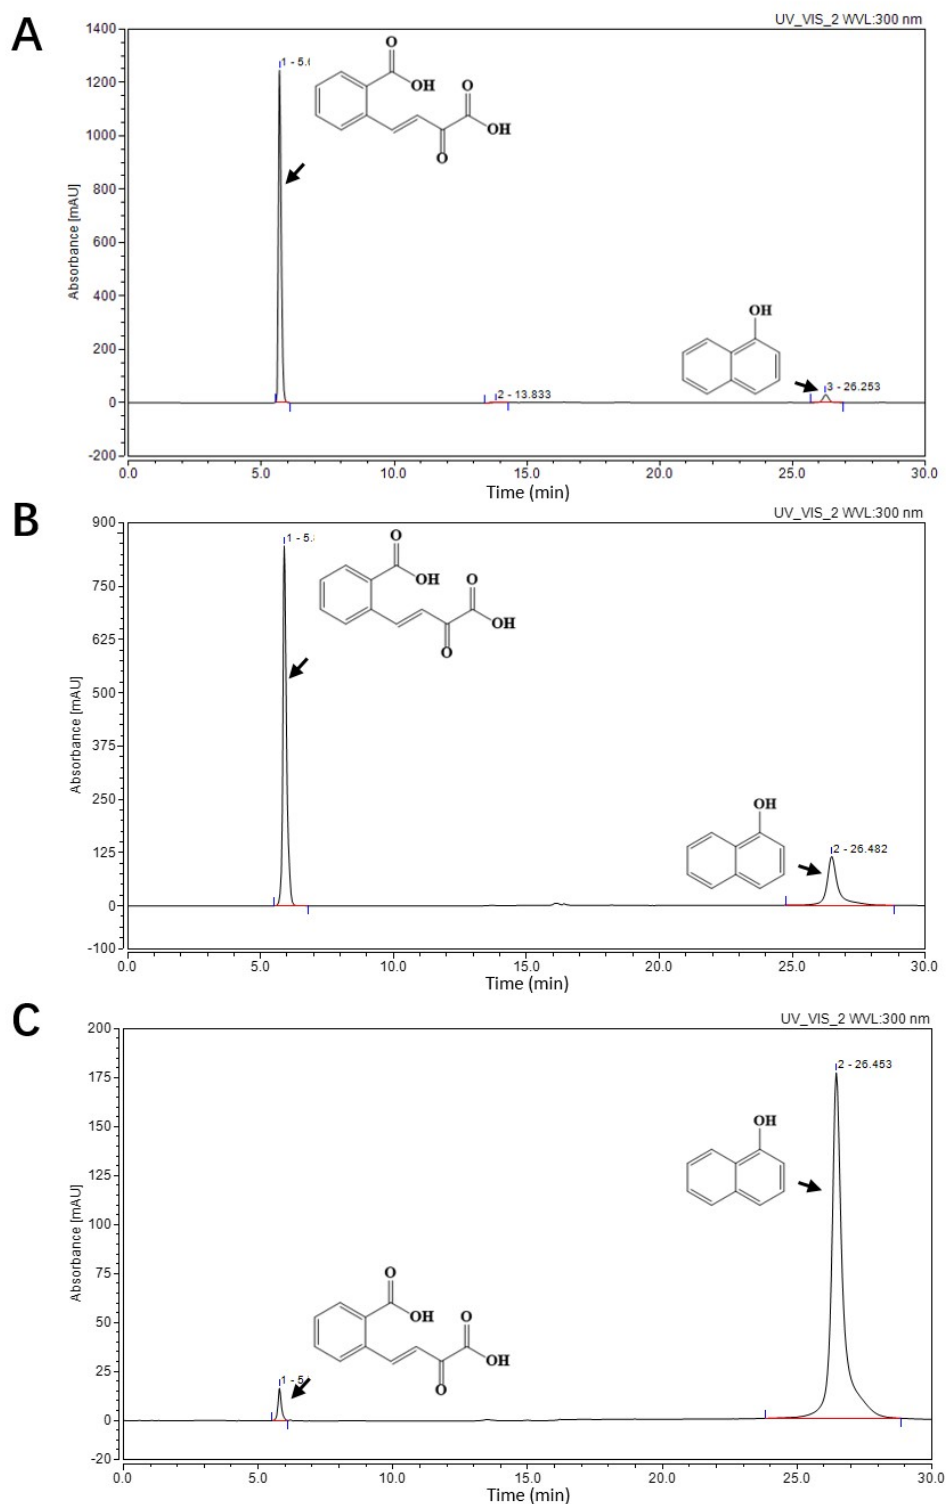

**Fig. S11** HPLC analysis of conversion of 1-naphthol in presence of CO<sub>2</sub> with bubbling (A), CO<sub>2</sub> without bubbling (B) and air (C) without bubbling.

## SUPPORTING INFORMATION

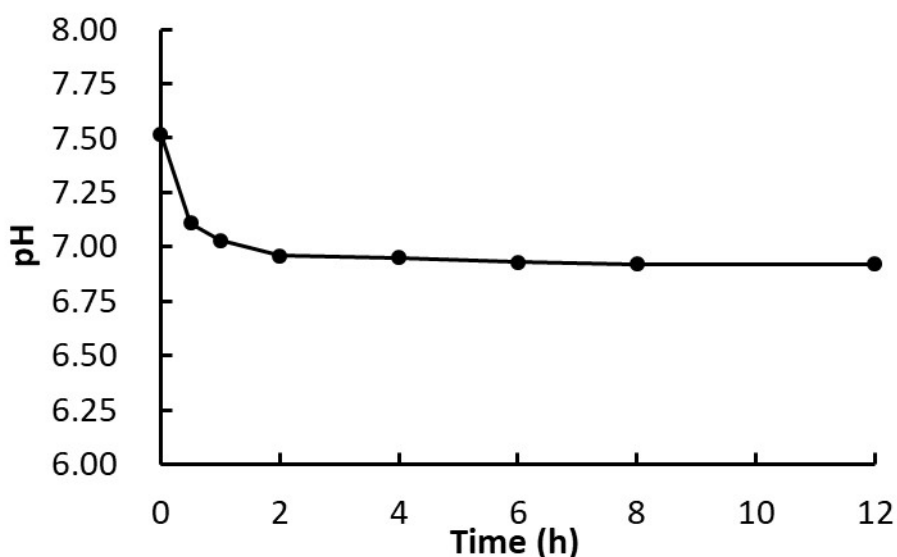

**Fig. S12** The pH changed of the reaction solution One-pot conversion of 1-naphthol to 2'-carboxybenzyl-pyruvic acid with atmospheric CO<sub>2</sub> at 30 °C.

**Table S1** The activity of 2,3-DHBD\_Ao at varied pH values

| pH value               | pH6.5  | pH7.0  | pH7.5  |
|------------------------|--------|--------|--------|
| Reaction rate (mM/min) | 0.0842 | 0.0818 | 0.0544 |

**Table S2** The activity of 1-HNDO\_Mv at varied pH values

| pH value               | pH6.5  | pH7.0  | pH7.5  |
|------------------------|--------|--------|--------|
| Reaction rate (mM/min) | 0.1127 | 0.0809 | 0.0795 |

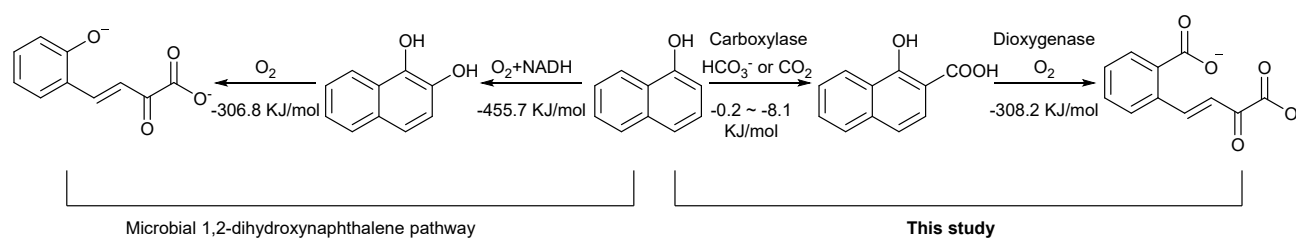

**Scheme S1** Comparison of the thermodynamics of 1-hydroxy-2-naphthoic acid route (this study) and the reported microbial 1,2-dihydroxynaphthalene pathway. The Δ<sub>r</sub>G' value (reaction Gibbs energy) was calculated by using eQuilibrator (10 mM substrate, 100 mM CO<sub>2</sub> (O<sub>2</sub>), 40 μM product, 1 mM NADH only for enzymatic hydroxylation, pH=7.5, pMg=3, ionic strength=0.25 M)

### 3. References

- 1 K. Plasch, G. Hofer, W. Keller, S. Hay, D. J. Heyes, A. Dennig, S. M. Glueck and K. Faber, *Green Chem.*, 2018, **20**, 1754–1759.
- 2 R. Santha, N. Appaji Rao and C. S. Vaidyanathan, *Biochim. Biophys. Acta.*, 1996, **1293**, 191–200.
- 3 M. Yoshida, N. Fukuhara and T. Oikawa, *J Bacteriol.*, 2004, **186**, 6855–6863.
- 4 M. Goto, H. Hayashi, I. Miyahara, K. Hirotsu, M. Yoshida and T. Oikawa, *J Biol. Chem.*, 2006, **281**, 34365–34373.
- 5 K. Kirimura, H. Gunji, R. Wakayama, T. Hattori and Y. Ishii, *Biochem. Biophys. Res. Commun.*, 2010, **394**, 279–284.
- 6 R. L. Stingley, A. A. Khan and C. E. Cerniglia, *Biochem. Biophys. Res. Commun.*, 2004, **322**, 133–146.
- 7 H. Mishra, S. Maheshwary, H. B. Tripathi and N. Sathyamurthy, *J. Phys. Chem. A*, 2005, **109**, 2746–2754.
- 8 Y. Fan, J. Feng, M. Yang, X. Tan, H. Fan, M. Guo, B. Wang and S. Xue, *Green Chem.*, 2021, **23**, 4403–4409.
